# Supplementary material for: n-Doping of thermally polymerizable fullerenes as an electron transporting layer for inverted polymer solar cells
Source: Royal Society of Chemistry journal article supplement (doi:10.1039/c1jm10214a), 2011-01-01
Supplement: c1jm10214a.pdf [file c1jm10214a.pdf]

## Supporting Information

### N-doping of thermally polymerizable fullerenes as an Electron Transporting Layer for Inverted Polymer Solar Cells

Namchul Cho, Hin-Lap Yip, Steven K. Hau, Kung-Shih Chen, Tae-Wook Kim, Joshua A. Davies, David F. Zeigler, and Alex K. -Y. Jen\*

Received (in XXX, XXX) Xth XXXX 2010, Accepted Xth XXXX 2010

First published on the web Xth XXXXXXXXXX 2010

DOI: 10.1039/b000000x

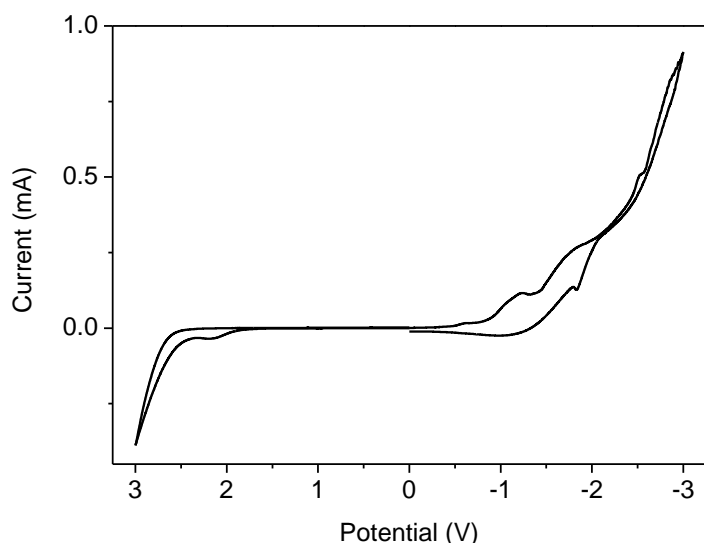

10 Figure S1. Cyclic voltammograms of P-PCBM-S films on ITO glass in a 0.1 M solution of TBAPF<sub>6</sub> in acetonitrile scanned at a rate of 100 mV/s.

Table S1. Electronic structure parameters of P-PCBM-S film

| material | Ionization potential <sup>a</sup> (eV) | Electron affinity <sup>b</sup> (eV) | $E_g^{\text{el}}$ (eV) <sup>c</sup> | $E_g^{\text{opt}}$ (eV) <sup>d</sup> |
|----------|----------------------------------------|-------------------------------------|-------------------------------------|--------------------------------------|
| P-PCBM-S | 5.96 (5.81) <sup>e</sup>               | 3.67                                | 2.29                                | 2.14                                 |

15 <sup>a</sup> Determined from the onset oxidation potential. <sup>b</sup> Determined from the onset reduction potential. <sup>c</sup> Electrochemical bandgap  $E_g^{\text{el}} = \text{ionization potential} - \text{electron affinity}$ . <sup>d</sup> Optical bandgap  $E_g^{\text{opt}}$  estimated from the optical absorption-onset of P-PCBM-S thin films. <sup>e</sup> Determined from  $\text{ionization potential} = \text{electron affinity} + E_g^{\text{opt}}$ .
